# Supplementary material
Source: PubMed Central journal article supplement (PMC4744098)

**Supplementary Figure 1: Functional Annotation of the *FKBP4* locus.** Chromosomal coordinates (Chr12: 2,878,815-2,919,530 (GR37/hg19)) are shown across the top of the locus.

The coding region of *FKBP4* is shown by black vertical lines (exons, untranslated regions) and horizontal lines (introns), with direction of transcription shown by small arrows within introns. Genotyped SNPs that were significantly associated with PCOS are shown within rectangles, and SNPs with which they are in linkage disequilibrium ( $r^2 > 0.8$ ) are marked with \* in the corresponding color. Active chromatin sites are shown by DNase I hypersensitivity clusters (by greyscale with black indicating high chromatin availability). Transcription factor binding sites (TFBSs) are shown by greyscale, with black indicating high transcription factor occupancy. Chromatin states in six ENCODE cell lines (GM12878, Epstein-Barr virus transformed B-lymphocyte cell line from Caucasian (CEPH) subject from the International HapMap Project; H1-hESC, embryonic stem cell; K562, immortalized cell line produced from a female patient with chronic myelogenous leukemia; HeLa-S3, immortalized cell line derived from a patient with cervical cancer; HepG2, cell line derived from a male patient with liver carcinoma; HUVEC, human umbilical vein endothelial cells) are highlighted as follows: active enhancer (orange), poised enhancer (yellow), promoter/transcription start site (red), promoter flanking region (pink), insulator binding site (blue), transcribed (green), inactive chromatin (grey).

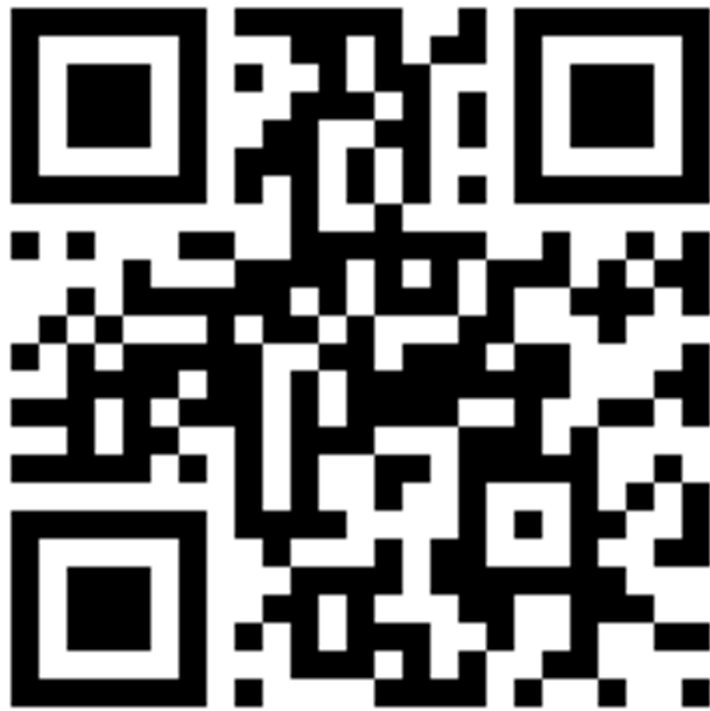

### Supplementary Table 1

Power to detect association with PCOS: 354 cases, 161 controls, alpha=0.05

| Risk allele frequency = 0.1 |               |       | Risk allele frequency = 0.2 |               |       | Risk allele frequency = 0.3 |               |       |
|-----------------------------|---------------|-------|-----------------------------|---------------|-------|-----------------------------|---------------|-------|
| Marker allele frequency     | Relative risk | Power | Marker allele frequency     | Relative risk | Power | Marker allele frequency     | Relative risk | Power |
| 0.1                         | 1.5           | 0.43  | 0.2                         | 1.5           | 0.53  | 0.3                         | 1.5           | 0.51  |
|                             | 1.75          | 0.70  |                             | 1.75          | 0.79  |                             | 1.75          | 0.76  |
|                             | 2             | 0.87  |                             | 2             | 0.93  |                             | 2             | 0.90  |
|                             | 3             | 0.99  |                             | 3             | 0.99  |                             | 3             | 0.99  |
| 0.2                         | 1.5           | 0.24  | 0.3                         | 1.5           | 0.36  | 0.4                         | 1.5           | 0.37  |
|                             | 1.75          | 0.43  |                             | 1.75          | 0.60  |                             | 1.75          | 0.59  |
|                             | 2             | 0.62  |                             | 2             | 0.78  |                             | 2             | 0.76  |
|                             | 3             | 0.96  |                             | 3             | 0.99  |                             | 3             | 0.98  |

Power to detect association with PCOS: 397 cases, 306 controls, alpha=0.05

| Risk allele frequency = 0.1 |               |       | Risk allele frequency = 0.2 |               |       | Risk allele frequency = 0.3 |               |       |
|-----------------------------|---------------|-------|-----------------------------|---------------|-------|-----------------------------|---------------|-------|
| Marker allele frequency     | Relative risk | Power | Marker allele frequency     | Relative risk | Power | Marker allele frequency     | Relative risk | Power |
| 0.1                         | 1.5           | 0.62  | 0.2                         | 1.5           | 0.73  | 0.3                         | 1.5           | 0.70  |
|                             | 1.75          | 0.89  |                             | 1.75          | 0.94  |                             | 1.75          | 0.92  |
|                             | 2             | 0.98  |                             | 2             | 0.99  |                             | 2             | 0.98  |
|                             | 3             | 0.99  |                             | 3             | 0.99  |                             | 3             | 0.99  |
| 0.2                         | 1.5           | 0.36  | 0.3                         | 1.5           | 0.52  | 0.4                         | 1.5           | 0.53  |
|                             | 1.75          | 0.62  |                             | 1.75          | 0.80  |                             | 1.75          | 0.79  |
|                             | 2             | 0.82  |                             | 2             | 0.94  |                             | 2             | 0.92  |
|                             | 3             | 0.99  |                             | 3             | 0.99  |                             | 3             | 0.99  |

**Supplementary Table 2: Frequency and position information for SNPs in the discovery cohort**

| SNP                 | Coordinates                 | Location<br>in gene | Alleles <sup>a</sup> | Overall<br>MAF <sup>b</sup> | PCOS<br>MAF | Control<br>MAF |
|---------------------|-----------------------------|---------------------|----------------------|-----------------------------|-------------|----------------|
| <b><i>FKBP4</i></b> | chr12:2,794,953-2,805,423   |                     |                      |                             |             |                |
| rs7973927           | 2,745,644                   | 5' near gene        | G/A                  | 0.26                        | 0.26        | 0.28           |
| rs4238008           | 2,763,663                   | 5' near gene        | A/G                  | 0.23                        | 0.23        | 0.26           |
| rs11062351          | 2,772,597                   | 5' near gene        | G/A                  | 0.4                         | 0.38        | 0.42           |
| rs10848704          | 2,773,378                   | 5' near gene        | G/A                  | 0.21                        | 0.21        | 0.21           |
| rs4765709           | 2,774,471                   | 5' near gene        | G/A                  | 0.36                        | 0.34        | 0.39           |
| rs4075718           | 2,775,142                   | 5' near gene        | A/G                  | 0.21                        | 0.2         | 0.21           |
| rs4409904           | 2,776,963                   | 5' near gene        | A/G                  | 0.14                        | 0.12        | 0.18           |
| rs4073426           | 2,777,133                   | 5' near gene        | A/G                  | 0.18                        | 0.18        | 0.18           |
| rs2968909           | 2,788,698                   | 5' near gene        | G/C                  | 0.17                        | 0.16        | 0.2            |
| rs3759411           | 2,792,404                   | 5' near gene        | G/A                  | 0.13                        | 0.12        | 0.14           |
| rs11062360          | 2,805,002                   | 3' UTR <sup>c</sup> | G/A                  | 0.07                        | 0.07        | 0.08           |
| <b><i>STI3</i></b>  | chr22:40,824,535-40,857,022 |                     |                      |                             |             |                |
| rs13054099          | 40,819,668                  | 3' near gene        | G/A                  | 0.25                        | 0.25        | 0.25           |
| rs6002171           | 40,827,855                  | Intron 10           | A/G                  | 0.05                        | 0.05        | 0.07           |
| rs5750998           | 40,833,145                  | Intron 7            | A/G                  | 0.05                        | 0.04        | 0.07           |
| rs7290793           | 40,855,008                  | Intron 1            | A/G                  | 0.08                        | 0.07        | 0.09           |
| rs138351            | 40,866,848                  | 5' near gene        | A/G                  | 0.22                        | 0.22        | 0.23           |
| rs138354            | 40,876,139                  | 5' near gene        | A/G                  | 0.46                        | 0.48        | 0.45           |

|                      |                               |              |     |      |      |      |
|----------------------|-------------------------------|--------------|-----|------|------|------|
| rs1005402            | 40,895,726                    | 5' near gene | A/G | 0.47 | 0.47 | 0.47 |
| <hr/>                |                               |              |     |      |      |      |
| <b><i>HSPA8</i></b>  | chr11:123,057,489-123,062,335 |              |     |      |      |      |
| rs7123232            | 123,056,237                   | 3' near gene | A/G | 0.16 | 0.16 | 0.17 |
| rs12575564           | 123,065,958                   | 5' near gene | A/G | 0.14 | 0.14 | 0.15 |
| rs11218950           | 123,072,200                   | 5' near gene | A/G | 0.05 | 0.05 | 0.06 |
| rs11218954           | 123,075,352                   | 5' near gene | G/A | 0.21 | 0.2  | 0.23 |
| rs7113273            | 123,092,192                   | 5' near gene | G/A | 0.28 | 0.27 | 0.28 |
| rs11218981           | 123,100,750                   | 5' near gene | A/G | 0.12 | 0.12 | 0.11 |
| rs7933576            | 123,105,745                   | 5' near gene | A/G | 0.1  | 0.1  | 0.09 |
| <hr/>                |                               |              |     |      |      |      |
| <b><i>STUB1</i></b>  | chr16:680,276-682,799         |              |     |      |      |      |
| rs2076142            | 650,970                       | 5' near gene | A/G | 0.22 | 0.22 | 0.21 |
| rs3752490            | 667,828                       | 5' near gene | A/C | 0.35 | 0.34 | 0.37 |
| rs11557858           | 669,592                       | 5' near gene | A/G | 0.13 | 0.12 | 0.16 |
| rs1045763            | 674,084                       | 5' near gene | A/G | 0.06 | 0.06 | 0.06 |
| rs3830140            | 675,335                       | 5' near gene | A/G | 0.09 | 0.09 | 0.08 |
| rs6597               | 681,725                       | Intron 3     | C/A | 0.16 | 0.16 | 0.16 |
| <hr/>                |                               |              |     |      |      |      |
| <b><i>STIP1</i></b>  | chr11:64,186,115-64,204,543   |              |     |      |      |      |
| rs7112960            | 64,139,607                    | 5' near gene | G/A | 0.35 | 0.36 | 0.34 |
| rs1123251            | 64,150,129                    | 5' near gene | C/A | 0.5  | 0.5  | 0.49 |
| rs11603212           | 64,160,338                    | 5' near gene | G/A | 0.17 | 0.18 | 0.16 |
| rs4980508            | 64,174,262                    | 5' near gene | C/A | 0.5  | 0.5  | 0.49 |
| rs1011219            | 64,205,924                    | 3' near gene | A/G | 0.16 | 0.16 | 0.17 |
| <hr/>                |                               |              |     |      |      |      |
| <b><i>HSPA1A</i></b> | chr6:31,815,464-31,817,946    |              |     |      |      |      |

|                      |                             |              |     |      |      |      |
|----------------------|-----------------------------|--------------|-----|------|------|------|
| rs707928             | 31,774,813                  | 5' near gene | G/A | 0.35 | 0.33 | 0.38 |
| rs2736426            | 31,777,507                  | 5' near gene | G/A | 0.45 | 0.44 | 0.47 |
| rs480092             | 31,797,122                  | 5' near gene | G/A | 0.18 | 0.17 | 0.22 |
| rs2075800            | 31,810,169                  | 5' near gene | A/G | 0.33 | 0.36 | 0.28 |
| rs2075799            | 31,810,752                  | 5' near gene | A/G | 0.09 | 0.1  | 0.07 |
| <hr/>                |                             |              |     |      |      |      |
| <b><i>PTGES3</i></b> | chr12:56,663,343-56,688,300 |              |     |      |      |      |
| rs17444799           | 56,670,615                  | Intron 4     | A/G | 0.06 | 0.06 | 0.07 |
| rs2926743            | 56,720,316                  | 5' near gene | A/G | 0.28 | 0.29 | 0.23 |
| rs11171952           | 56,722,877                  | 5' near gene | A/G | 0.08 | 0.08 | 0.09 |
| rs2035081            | 56,732,095                  | 5' near gene | A/G | 0.37 | 0.38 | 0.33 |
| <hr/>                |                             |              |     |      |      |      |
| <b><i>BAG1</i></b>   | chr9:33,252,477-33,264,761  |              |     |      |      |      |
| rs3758270            | 33,263,676                  | Intron 1     | G/A | 0.06 | 0.07 | 0.05 |
| rs844239             | 33,270,481                  | 5' near gene | A/G | 0.24 | 0.24 | 0.21 |
| rs831275             | 33,282,673                  | 5' near gene | A/G | 0.15 | 0.15 | 0.15 |

<sup>a</sup>Alleles are listed as minor/major, <sup>b</sup>MAF = minor allele frequency, <sup>c</sup>UTR = untranslated region  
Coordinates are from the UCSC Genome Browser on human Dec. 2013 (GRCh38/hg38)  
assembly.

**Supplementary Table 3: Association of *FKBP4* variants with quantitative traits in women with PCOS**

| SNP                | Trait              | Beta    | SE    | P value |
|--------------------|--------------------|---------|-------|---------|
| Discovery cohort   |                    |         |       |         |
| rs2968909          | Total testosterone | -0.433  | 1.691 | 0.80    |
| rs2968909          | DHEAS              | -3.686  | 2.532 | 0.15    |
| rs2968909          | Insulin            | -11.060 | 4.450 | 0.013   |
| rs2968909          | HOMA-IR            | -7.585  | 4.759 | 0.11    |
| rs2968909          | HOMA-%B            | -7.937  | 4.975 | 0.11    |
| rs2968909          | Glucose            | -18.640 | 7.937 | 0.019   |
| rs2968909          | BMI                | -0.005  | 0.028 | 0.87    |
| rs4409904          | Total testosterone | 1.445   | 1.901 | 0.45    |
| rs4409904          | DHEAS              | 2.576   | 2.848 | 0.37    |
| rs4409904          | Insulin            | -5.507  | 5.021 | 0.27    |
| rs4409904          | HOMA-IR            | -3.879  | 5.351 | 0.47    |
| rs4409904          | HOMA-%B            | -4.087  | 5.594 | 0.47    |
| rs4409904          | Glucose            | -11.120 | 8.940 | 0.21    |
| rs4409904          | BMI                | 0.011   | 0.032 | 0.73    |
| Replication cohort |                    |         |       |         |
| rs2968909          | Total testosterone | 0.240   | 0.589 | 0.68    |
| rs2968909          | DHEAS              | 0.241   | 2.155 | 0.91    |
| rs2968909          | Insulin            | 4.102   | 3.481 | 0.24    |
| rs2968909          | HOMA-IR            | 6.427   | 3.885 | 0.099   |
| rs2968909          | HOMA-%B            | 6.736   | 4.050 | 0.097   |



|           |                    |        |       |        |
|-----------|--------------------|--------|-------|--------|
| rs2968909 | Glucose            | 4.386  | 5.082 | 0.39   |
| rs2968909 | BMI                | -0.074 | 0.026 | 0.0043 |
| rs4409904 | Total testosterone | 0.332  | 0.702 | 0.64   |
| rs4409904 | DHEAS              | 0.814  | 2.688 | 0.76   |
| rs4409904 | Insulin            | 1.073  | 4.175 | 0.80   |
| rs4409904 | HOMA-IR            | 1.000  | 4.691 | 0.83   |
| rs4409904 | HOMA-%B            | 1.022  | 4.891 | 0.83   |
| rs4409904 | Glucose            | 1.857  | 6.029 | 0.76   |
| rs4409904 | BMI                | -0.030 | 0.032 | 0.36   |

Associations above are adjusted for age, BMI, and recruitment site, except for BMI where adjustment was for age and site. Testosterone and DHEAS were square root transformed and BMI, insulin, HOMA-IR, and HOMA-%B were log transformed. SE = standard error; DHEAS = dehydroepiandrosterone sulfate.

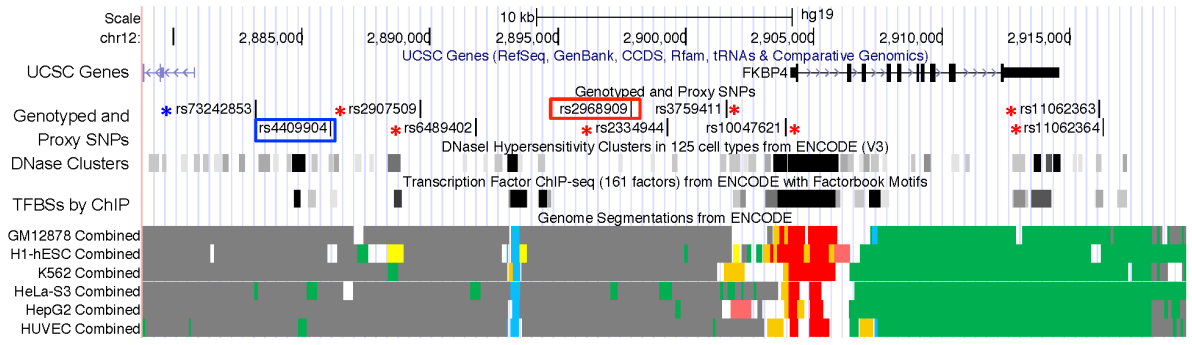

Supplement: NIHMS736109-supplement-01.pdf [file NIHMS736109-supplement-01.pdf]
